# Supplementary material for: Phylogeny and divergence times of suckers (Cypriniformes: Catostomidae) inferred from Bayesian total-evidence analyses of molecules, morphology, and fossils
Source: PeerJ journal article supplement (doi:10.7717/peerj.5168), 2018-07-04

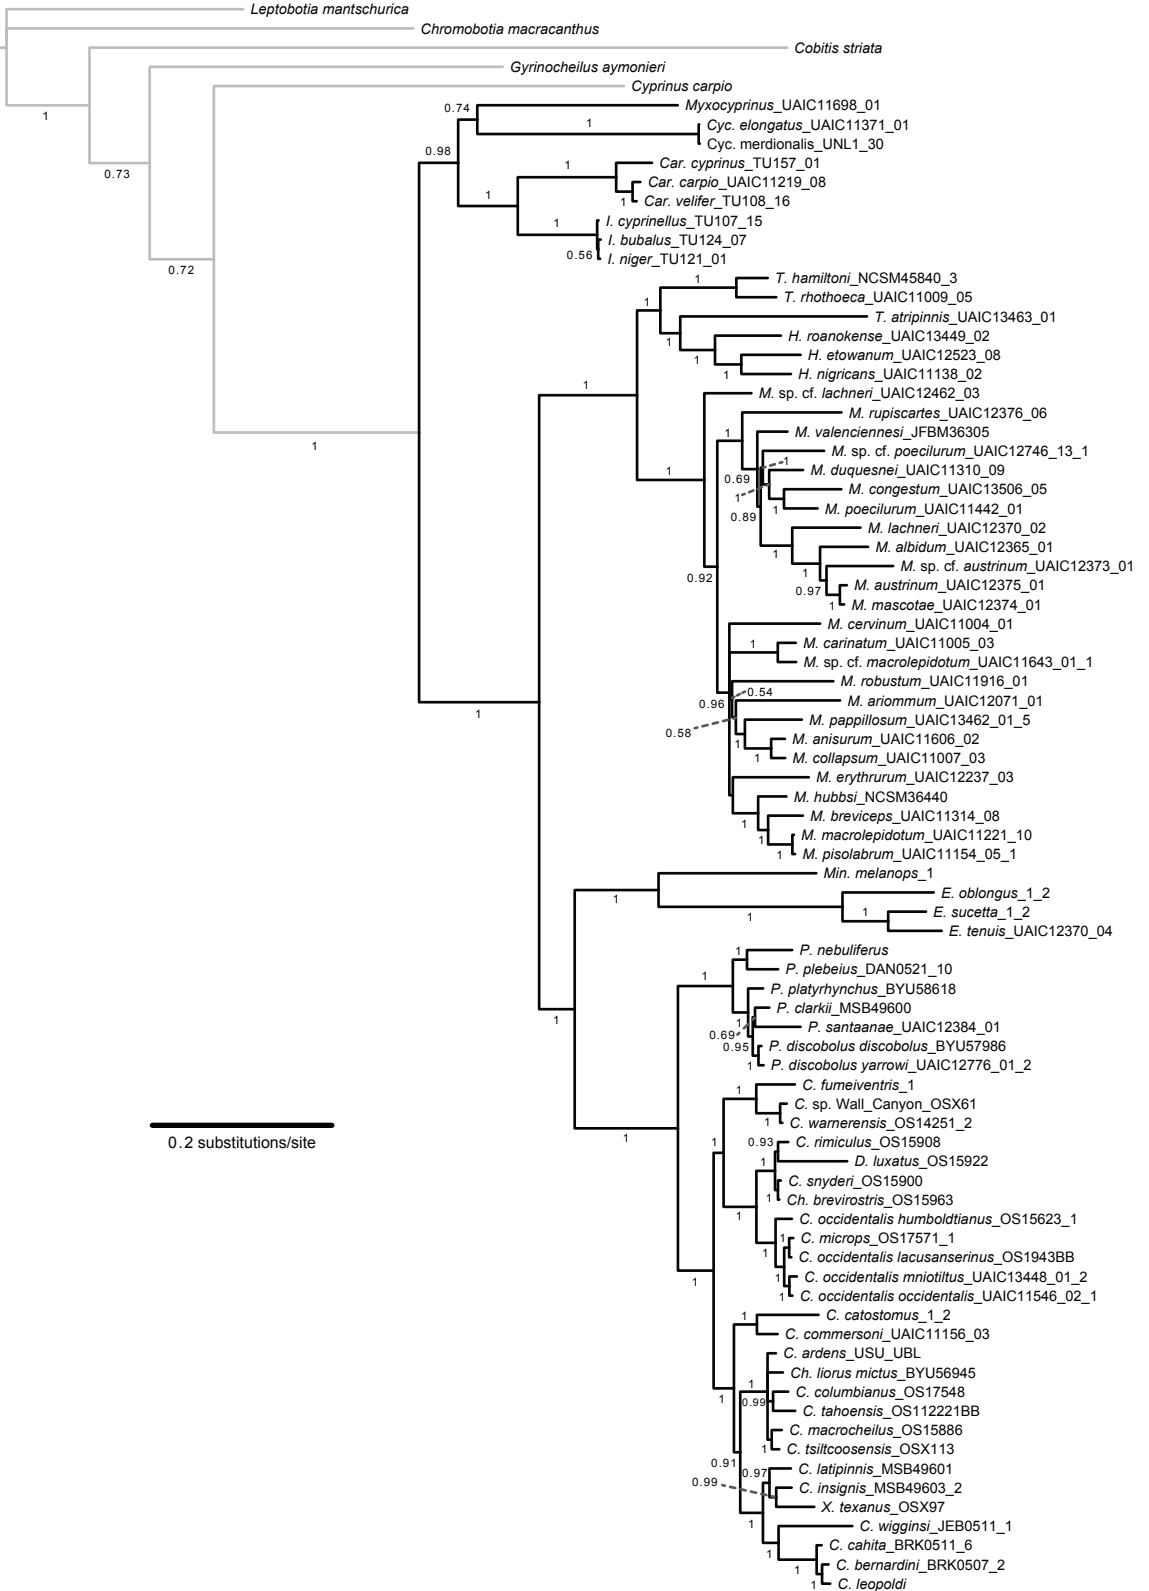

Supplement: SuppMat-Fig_S1_170x212mm.pdf [file SuppMat-Fig_S1_170x212mm.pdf]
